# Supplementary material for: Higher measured than modeled ozone production at increased NO x levels in the Colorado Front Range
Source: Copernicus journal article supplement (doi:10.5194/acp-2016-1089), 2017-01-04
Supplement: Supplementary file 1 [file acp-2016-1089-supplement.pdf]

# 1 Aircraft VOC measurements

2 Constant, median mixing ratios of VOCs measured on the NCAR C-130 and NASA P-3B during the  
3 FRAPPÈ and DISCOVER-AQ field campaigns are used to supplement whole-air canister VOCs  
4 and further constrain the RACM2 and MCMv331 chemical models used in this study. Median  
5 mixing ratios and standard deviations of species for MOPS measurement days are shown in Table  
6 S1. Mixing ratios are calculated for only measurement points less than 1 km asl for the vicinity of  
7 Golden, CO, and a well-mixed boundary layer is assumed.

## 8 2 Model uncertainty analyses

9 To calculate the RACM2 uncertainty, we use a Random Sampling-High Dimensional Model Rep-  
10 resentation (RS-HDMR) technique outlined in Chen et al. (2012) and Chen and Brune (2012).  
11 Median values of all model inputs are calculated for the following two-hour time periods: 0600-  
12 0800 LT, 0800-1000 LT, 1000-1200 LT, 1200-1400 LT, and 1400-1800 LT. In total, 7 inorganic  
13 species, 32 VOC groups, 34 photolysis rates, 443 reaction rate coefficients, 615 product yields, and  
14 168 deposition rates were randomly varied across their respective uncertainty ranges to determine  
15 the influence of input perturbations on model  $P(O_3)$ . Input uncertainties are outlined in Table S2.  
16 To further reduce computational time, the Morris Method is used to pre-screen model constraints,  
17 identifying roughly 50-100 of the most influential inputs on the model output,  $P(O_3)$  (Morris,  
18 1991). The  $P(O_3)$  variation due to changes in influential inputs and parameters is computed using  
19 Aerodyne Research, Inc. ExploreHD software (<http://www.aerodyne.com/products/explorehd>),  
20 decomposing the contribution of individual model inputs on the  $P(O_3)$  output. The RACM2 RS-  
21 HDMR model  $P(O_3)$  uncertainties are determined as the standard deviation in calculated  $P(O_3)$   
22 divided by its mean  $P(O_3)$  for each time period above (Table S4).

23 The MCMv331 uncertainty is calculated for the same time periods between 0600-1800 LT by  
24 perturbing model constraints one-at-a-time to both their upper or lower uncertainty limits in a  
25 local sensitivity analysis. That is, for each sensitivity run, each variable or group of variables is  
26 adjusted to their upper or lower uncertainty values while keeping all other constraints at their  
27 original values. The following input groups are perturbed one at a time to examine its effect  
28 on MCMv331-calculated  $P(O_3)$ :  $NO_x$  ( $NO_2 + NO$ ),  $O_3$ , photolysis rates (J-values), all measured

29 VOCs, product yields, and reaction rate coefficients. We select and vary reaction rate coefficients  
30 and product yields that are considered to be influential from the RACM2 RS-HDMR analysis. The  
31 MCMv331 input and parameter uncertainties ( $1\sigma$ ) for these selected parameters are shown in Table  
32 S3.

33 The percent differences for each sensitivity run from the MCMv331 base run are shown in Fig.  
34 S1. All upper and lower percent deviations in Fig. S1 are added in quadrature to determine total  
35 upper and lower uncertainty bounds for MCMv331 P(O<sub>3</sub>). Hourly uncertainties for MCMv331  
36 P(O<sub>3</sub>) are averaged for each RACM2 uncertainty time period and shown in Table S4.

### 37 **3 Model sensitivity studies varying HO<sub>x</sub> and NO<sub>x</sub> species**

38 A number of model sensitivity studies focusing on HO<sub>x</sub> (HO<sub>2</sub> + OH) and NO<sub>x</sub> (NO<sub>2</sub> + NO) cycling  
39 have been conducted to assess model behavior to changes in these species. One reaction that we  
40 speculate can explain the observed discrepancy between modeled and measured HO<sub>2</sub>, and thus  
41 modeled and measured P(O<sub>3</sub>), is the reaction described in the main text,

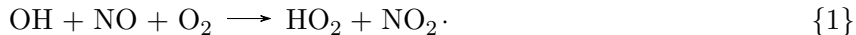

42 We explore the effect of adding this reaction to the base case MCMv331 runs, assuming at-  
43 mospheric O<sub>2</sub> levels and varying an effective bimolecular rate coefficient for this reaction between  
44 (3-15)x10<sup>-11</sup> cm<sup>3</sup> molecule<sup>-1</sup>s<sup>-1</sup>. When this rate coefficient is adjusted to higher values (faster rate  
45 of reaction), closer agreement is seen between MOPS and modeled P(O<sub>3</sub>) diurnal patterns. Figure  
46 S2 shows the effect of varying this reaction rate coefficient.

47 NO<sub>x</sub> levels were also adjusted up or down by a factor of two to assess model sensitivity to  
48 this species. While varying NO<sub>x</sub> levels, it is clear that (as in a VOC-sensitive regime), increasing  
49 NO<sub>x</sub> levels decrease P(O<sub>3</sub>), while lowering NO<sub>x</sub> levels acts to increase P(O<sub>3</sub>). Sensitivity runs  
50 that increase the thermal decomposition rate of peroxyxynitric acid (HO<sub>2</sub>NO<sub>2</sub>) by a factor of 5 as in  
51 Kanaya et al. (2007) are also shown, but elevate P(O<sub>3</sub>) at all times of the day rather than in the  
52 early morning when model-measurement P(O<sub>3</sub>) discrepancies exist and are most pronounced.

## 53 4 NO<sub>x</sub>-VOC sensitivity

54 To assess NO<sub>x</sub>-VOC sensitivity in this study, we calculate the metric L<sub>N</sub>/Q in RACM2, which  
55 represents the fraction of free radicals removed by NO<sub>x</sub> (Kleinman et al., 2001). A L<sub>N</sub>/Q value  
56 much greater than 0.5 represents a VOC-sensitive regime whereas a L<sub>N</sub>/Q value much less than  
57 0.5 represents a NO<sub>x</sub>-sensitive regime. This metric was calculated for full-campaign data on MOPS  
58 measurement days and suggests that before 1200 LT, ozone production is VOC-sensitive where  
59 decreases in VOCs will be more effective in decreasing P(O<sub>3</sub>) and subsequent NO<sub>x</sub> decreases will  
60 act to increase P(O<sub>3</sub>) (Fig. S3). After 1200 LT, P(O<sub>3</sub>) is primarily NO<sub>x</sub> sensitive, where decreasing  
61 NO<sub>x</sub> will linearly decrease P(O<sub>3</sub>). With the added OH + NO (+O<sub>2</sub>) → HO<sub>2</sub> + NO<sub>2</sub> reaction  
62 ( $k_{OH+NO} = 15 \times 10^{-11} \text{ cm}^3 \text{ molec}^{-1} \text{ s}^{-1}$ ), P(O<sub>3</sub>) shifts to a NO<sub>x</sub> sensitive regime approximately one  
63 to two hours earlier in the day, suggesting that there is a longer time period in the morning where  
64 P(O<sub>3</sub>) is NO<sub>x</sub>-sensitive, similar to conclusions drawn from the MOPS measurements.

## 65 References

- 66 Atkinson, R., 1991: Kinetics and Mechanisms of the Gas-Phase Reactions of the NO<sub>3</sub> Radical  
67 with Organic Compounds. *Journal of Physical and Chemical Reference Data*, **20** (3), 459–507,  
68 doi:10.1063/1.555887, URL [http://scitation.aip.org/content/aip/journal/jpcrd/20/3/10.1063/1.](http://scitation.aip.org/content/aip/journal/jpcrd/20/3/10.1063/1.555887)  
69 555887.
- 70 Atkinson, R., and S. M. Aschmann, 1989: Rate constants for the gas-phase reactions of the  
71 OH radical with a series of aromatic hydrocarbons at 296 ± 2 K. *Int. J. Chem. Kinet.*,  
72 **21** (5), 355–365, doi:10.1002/kin.550210506, URL [http://onlinelibrary.wiley.com/doi/10.1002/](http://onlinelibrary.wiley.com/doi/10.1002/kin.550210506/abstract)  
73 kin.550210506/abstract.
- 74 Atkinson, R., and Coauthors, 2006: Evaluated kinetic and photochemical data for atmospheric  
75 chemistry Volume II: gas phase reactions of organic species. *Atmos. Chem. Phys.*, **6** (11), 3625–  
76 4055, doi:10.5194/acp-6-3625-2006, URL <http://www.atmos-chem-phys.net/6/3625/2006/>.
- 77 Chen, S., and W. H. Brune, 2012: Global sensitivity analysis of ozone production and O<sub>3</sub>-NO<sub>x</sub>-VOC  
78 limitation based on field data. *Atmospheric Environment*, **55**, 288–296, doi:10.1016/j.atmosenv.  
79 2012.03.061.

80 Chen, S., W. H. Brune, O. O. Oluwole, C. E. Kolb, F. Bacon, G. Li, and H. Rabitz, 2012: Global  
81 sensitivity analysis of the regional atmospheric chemical mechanism: an application of random  
82 sampling-high dimensional model representation to urban oxidation chemistry. *Environmental*  
83 *science & technology*, **46 (20)**, 11 162–11 170, doi:10.1021/es301565w, PMID: 22963531.

84 Gao, D., W. R. Stockwell, and J. B. Milford, 1995: First-order sensitivity and uncertainty analysis  
85 for a regional-scale gas-phase chemical mechanism. *J. Geophys. Res.*, **100 (D11)**, 23 153–23 166,  
86 doi:10.1029/95JD02704, URL <http://onlinelibrary.wiley.com/doi/10.1029/95JD02704/abstract>.

87 Kanaya, Y., and Coauthors, 2007: Urban photochemistry in central Tokyo: 1. Observed and  
88 modeled OH and HO<sub>2</sub> radical concentrations during the winter and summer of 2004. *J. Geophys.*  
89 *Res.*, **112 (D21)**, D21 312, doi:10.1029/2007JD008670, URL [http://onlinelibrary.wiley.com/doi/](http://onlinelibrary.wiley.com/doi/10.1029/2007JD008670/abstract)  
90 [10.1029/2007JD008670/abstract](http://onlinelibrary.wiley.com/doi/10.1029/2007JD008670/abstract).

91 Kleinman, L. I., P. H. Daum, Y.-N. Lee, L. J. Nunnermacker, S. R. Springston, J. Weinstein-Lloyd,  
92 and J. Rudolph, 2001: Sensitivity of ozone production rate to ozone precursors.

93 Morris, M. D., 1991: Factorial sampling plans for preliminary computational experiments. *Techno-*  
94 *metrics*, **33 (2)**, 161–174.

95 Sander, S., and Coauthors, 2011: Chemical Kinetics and Photochemical Data for Use in Atmo-  
96 spheric Studies, Evaluation No. 17. JPL Publication 10-6. URL <http://jpldataeval.jpl.nasa.gov>.

Table S 1: Median mixing ratios and standard deviations of all aircraft species measured in the vicinity of Golden, CO for MOPS measurement days. Constant, median values of these species supplement the canister VOC measurements in both MCMv331 and RACM2.

| VOC name                         | Mixing<br>ratio<br>(ppbv) | $\sigma$ (ppbv) |
|----------------------------------|---------------------------|-----------------|
| acetaldehyde                     | 1.32                      | 0.72            |
| acetone                          | 3.51                      | 1.02            |
| HCHO                             | 1.78                      | 0.66            |
| nitric acid                      | 1.38                      | 0.54            |
| MEK                              | 0.28                      | 0.23            |
| methanol                         | 7.46                      | 3.39            |
| MVK/methacrolein <sup>a,b</sup>  | 100                       | 50.8            |
| acetic acid                      | 0.40                      | 0.38            |
| PAN <sup>a</sup>                 | 760                       | 370             |
| PPN <sup>a</sup>                 | 110                       | 60.0            |
| H <sub>2</sub> O <sub>2</sub>    | 1.90                      | 0.77            |
| CH <sub>3</sub> OOH              | 4.48                      | 1.78            |
| HCOOH                            | 1.28                      | 0.34            |
| ethanol                          | 1.00                      | 1.09            |
| camphene <sup>a</sup>            | 2.20                      | 4.40            |
| d-limonene/3-carene <sup>b</sup> | 1.70                      | 3.30            |

<sup>a</sup>In parts per trillion by volume (pptv)

<sup>b</sup>Methyl vinyl ketone and methacrolein are measured together; equal parts of each species is assumed in measurement. D-limonene/3-carene is grouped as limonene in MCMv331 and RACM2.

Table S 2: RACM2 RS-HDMR model input uncertainties adapted and estimated from Chen and Brune (2012) and modified for this study.

| Number | Model Input                                                                                                         | Uncertainty ( $1\sigma$ ,%) |
|--------|---------------------------------------------------------------------------------------------------------------------|-----------------------------|
| 3      | <i>Meteorological parameters:</i>                                                                                   | $\leq 10$                   |
| 7      | <i>Inorganics:</i>                                                                                                  |                             |
|        | Lowest: CO, CO <sub>2</sub>                                                                                         | 5                           |
|        | Highest: O <sub>3</sub> ,NO <sub>x</sub>                                                                            | 10                          |
| 32     | <i>VOC Groups:</i>                                                                                                  |                             |
|        | Lowest: ethene, ethane                                                                                              | 3                           |
|        | Highest: organic nitrates                                                                                           | >100                        |
|        | JNO <sub>2</sub>                                                                                                    | 40 <sup>a</sup>             |
| 33     | TUV photolysis rates                                                                                                | 40 <sup>a</sup>             |
| 443    | <i>Reaction rate coefficients</i>                                                                                   |                             |
|        | <i>Inorganic reactions:</i>                                                                                         |                             |
|        | Lowest: OH + H <sub>2</sub>                                                                                         | 5 <sup>b</sup>              |
|        | Highest: inorganics + NO <sub>3</sub> ,<br>HONO + OH, NO + O <sup>3</sup> P                                         | 42 <sup>b,d</sup>           |
|        | <i>Organic + OH:</i>                                                                                                |                             |
|        | Lowest: ethane, ethanol, methanol                                                                                   | 10 <sup>b</sup>             |
|        | Highest: ISO intermediate reactions                                                                                 | 75 <sup>a</sup>             |
|        | <i>Organics + NO<sub>3</sub></i>                                                                                    |                             |
|        | Lowest: $\alpha$ -pinene                                                                                            | 15 <sup>d</sup>             |
|        | Highest: DIEN (1,3-butadiene)                                                                                       | 133 <sup>d</sup>            |
|        | <i>Organics + O<sub>3</sub></i>                                                                                     |                             |
|        | Lowest: ISO                                                                                                         | 19 <sup>c</sup>             |
|        | Highest: isoprene nitrates, MOBA                                                                                    | 75 <sup>a</sup>             |
|        | <i>Peroxy radical + NO</i>                                                                                          | 75 <sup>f</sup>             |
|        | exceptions: ethene, CH <sub>3</sub> O <sub>2</sub> ,<br>TOL, unsaturated and aromatic aldehydes<br>and benzaldehyde | 144 <sup>b</sup>            |
|        | <i>RO<sub>2</sub> + RO<sub>2</sub> or HO<sub>2</sub></i>                                                            | 18-75 <sup>b,f</sup>        |
|        | <i>PAN chemistry</i>                                                                                                | 18-27 <sup>b</sup>          |
| 615    | <i>Product yields</i>                                                                                               | 10-27 <sup>e</sup>          |

<sup>a</sup>Estimated

<sup>b</sup>NASA JPL (Sander et al., 2011)

<sup>c</sup>IUPAC

<sup>d</sup>Atkinson (1991)

<sup>e</sup>Gao et al. (1995) and references therein

<sup>f</sup>Estimated by Chen and Brune (2012)

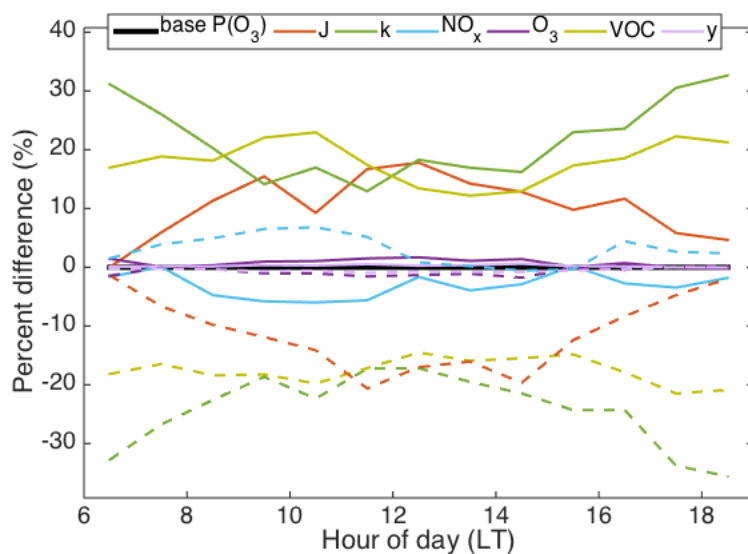

Figure S 1: MCM uncertainty analysis. Percent difference from base  $P(O_3)$  calculated by increasing or decreasing the following parameters by their  $1\sigma$  uncertainty levels: photolysis rates (J), select reaction rate coefficients (k),  $NO_x = NO_2 + NO$ ,  $O_3$ , all measured VOCs, and select product yields (y). Solid (dashed) lines represent the percent difference from the base MCMv331  $P(O_3)$  run when each species is set to its upper (lower) limit.

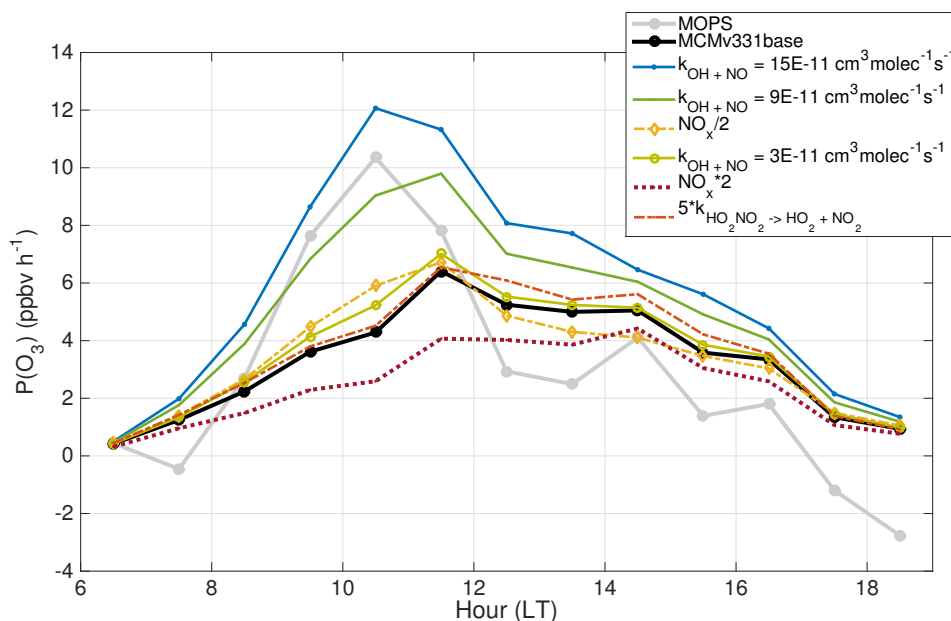

Figure S 2: Model sensitivity studies involving the possible missing reaction of OH plus NO yielding  $HO_2$  and  $NO_2$ , and other sensitivity studies varying  $NO_x$  by a factor of two and increasing the thermal decomposition rate of peroxyacetic acid by a factor of 5. Model case studies are compared to the median MCMv331 base case  $P(O_3)$  as well as the MOPS  $P(O_3)$ .

Table S 3: Summary of select reaction rates and product yields varied for MCMv331 uncertainty analysis. Names of species are listed according to the RACM2 naming convention. Select reaction rates and product yields were varied all at once with all other constraints held at their original values.

| Rate coefficient  | Uncertainty<br>(%, $1\sigma$ ) | Product yield <sup>e</sup>                 | Uncertainty<br>(%, $1\sigma$ ) |
|-------------------|--------------------------------|--------------------------------------------|--------------------------------|
| $k_{OH+NO_2}$     | 27 <sup>b</sup>                | Y(EPX + O <sub>3</sub> → HO <sub>2</sub> ) | 27                             |
| $k_{HO_2+NO}$     | 14 <sup>b</sup>                | Y(CH <sub>3</sub> OOH + OH → HCHO + OH )   | 18                             |
| $k_{O^1D+H_2O}$   | 8 <sup>b</sup>                 | Y(ISOP + NO → HO <sub>2</sub> )            | 27                             |
| $k_{ACO_3+NO}$    | 42 <sup>b</sup>                | Y(HC3P + NO → NO <sub>2</sub> )            | 27                             |
| $k_{PAN}$         | 18 <sup>b</sup>                | Y(XY2 → XYLP + HO <sub>2</sub> )           | 27                             |
| $k_{PPN}$         | 27 <sup>b</sup>                | Y(TR2 → products)                          | 27                             |
| $k_{RCO_3+NO_2}$  | 27 <sup>b</sup>                |                                            |                                |
| $k_{OH+ACD}$      | 5 <sup>b</sup>                 |                                            |                                |
| $k_{RCO_3+NO}$    | 42 <sup>b</sup>                |                                            |                                |
| $k_{EPX+O_3}$     | 75 <sup>a</sup>                |                                            |                                |
| $k_{XYO+OH}$      | 14 <sup>d</sup>                |                                            |                                |
| $k_{CH_3OOH+OH}$  | 40 <sup>b</sup>                |                                            |                                |
| $k_{OH+HCHO}$     | 14 <sup>b</sup>                |                                            |                                |
| $k_{XYM, XYP+OH}$ | 20 <sup>d</sup>                |                                            |                                |
| $k_{ISO+OH}$      | 10 <sup>c</sup>                |                                            |                                |
| $k_{ETE+OH}$      | 18 <sup>b</sup>                |                                            |                                |
| $k_{ACO_3+NO_2}$  | 18 <sup>b</sup>                |                                            |                                |

<sup>a</sup>Chen and Brune (2012)

<sup>b</sup>NASA JPL (Sander et al., 2011)

<sup>c</sup>Atkinson et al. (2006)

<sup>d</sup>Atkinson and Aschmann (1989)

<sup>e</sup>Gao et al. (1995)

Table S 4: Golden, CO RACM2 and MCMv331 model relative uncertainties ( $1\sigma$ ) between 0600 and 1800 local time.

| Time of day (LT)        | 0600- | 0800- | 1000- | 1200- | 1400- |
|-------------------------|-------|-------|-------|-------|-------|
|                         | 0800  | 1000  | 1200  | 1400  | 1800  |
| RACM2 Uncertainty (%)   | 30    | 33    | 31    | 28    | 28    |
| MCMv331 Uncertainty (%) | 33    | 30    | 30    | 28    | 32    |



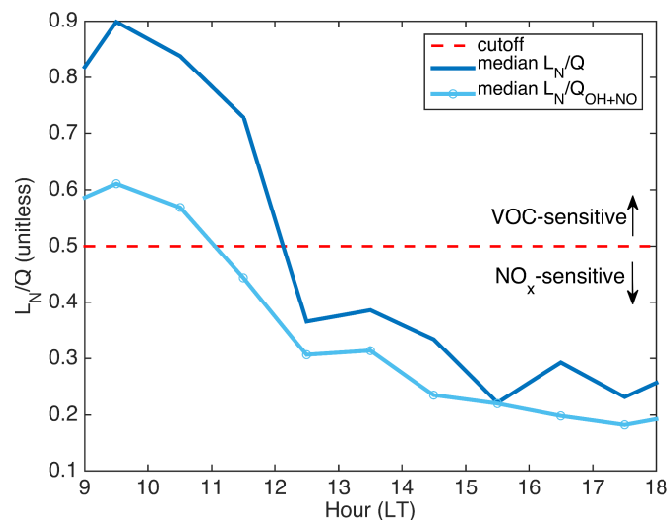

Figure S 3: Total median  $L_N/Q$ , representing the fraction of free radicals removed in the atmosphere by  $\text{NO}_x$ .  $L_N/Q$  higher than 0.5 is considered to be within a VOC-sensitive regime, whereas  $L_N/Q$  less than 0.5 is considered to be in a  $\text{NO}_x$ -sensitive regime. Also shown is the  $L_N/Q$  for RACM2 with the  $\text{OH} + \text{NO} (+ \text{O}_2) \rightarrow \text{HO}_2 + \text{NO}_2$  reaction added.
